# Supplementary material for: Characterization of PBI/Graphene Oxide Composite Membranes for the SO2 Depolarized Electrolysis at High Temperature
Source: MDPI journal article supplement (doi:10.3390/membranes12020116), 2022-01-20
Supplement: s1 [file s1]

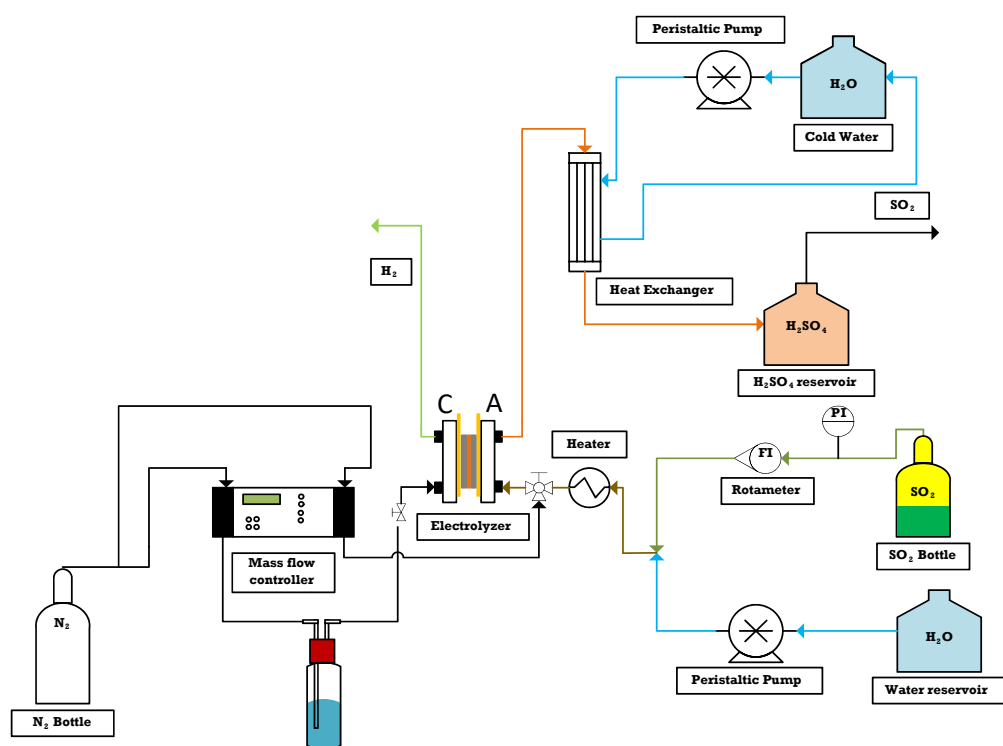

**Figure S1.** Experimental set-up

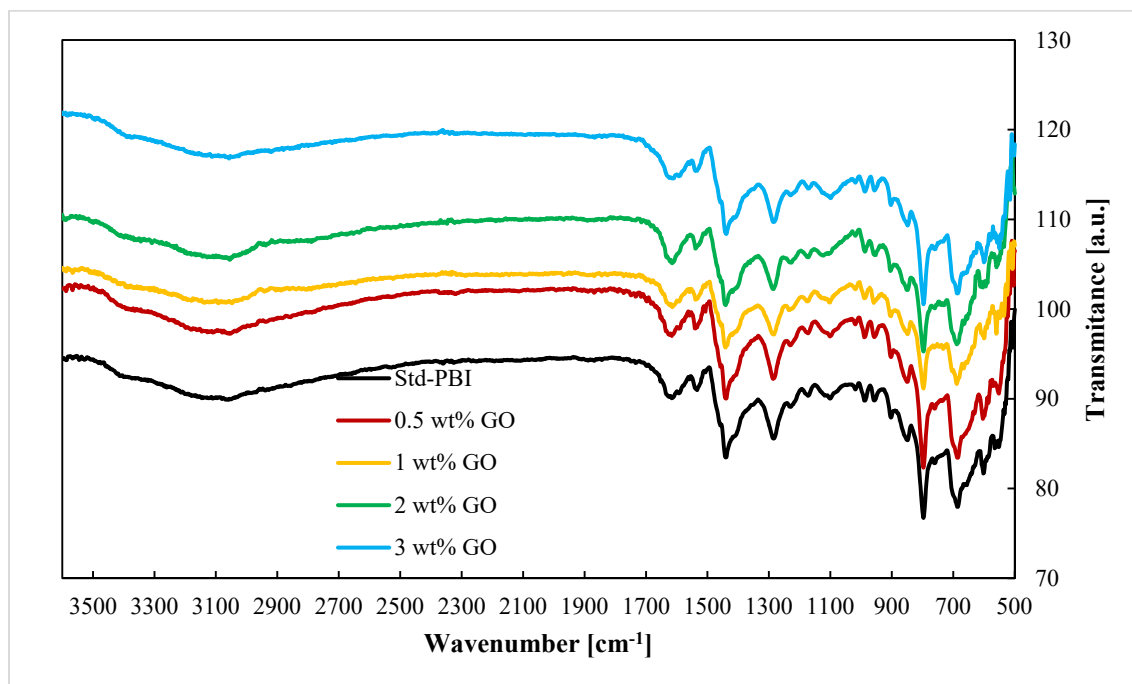

**Figure S2.** FTIR spectra for the studied membranes



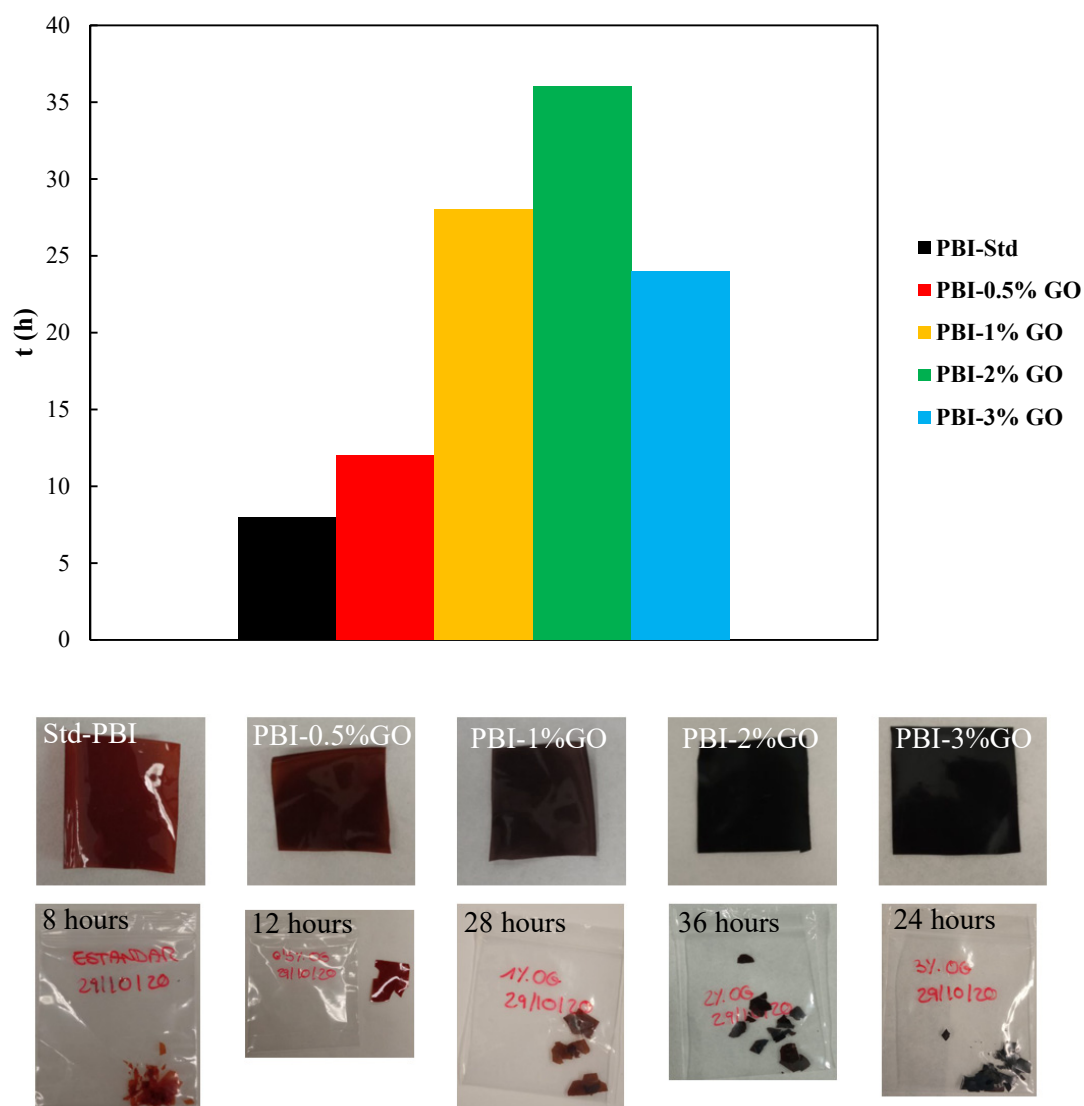

**Figure S3.** Persulfate chemical oxidation test performed for the studied membranes.

Photographs of the membrane before and after the test and the time at which they broke into pieces 1M  $H_2SO_4$ ; 500ppm  $Na_2S_2O_8$ ; 80 °C



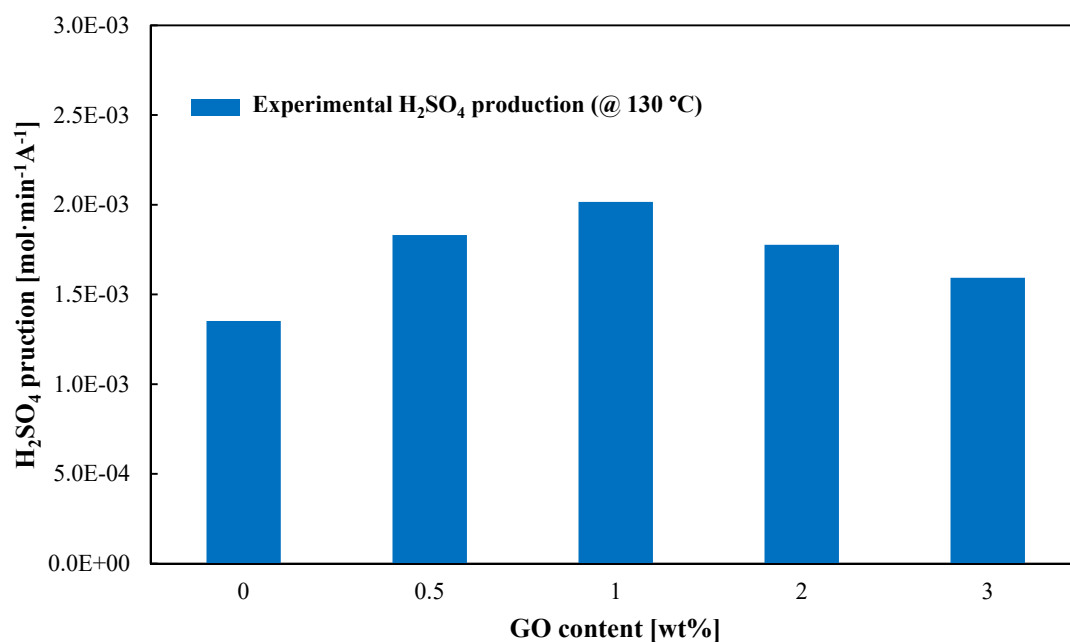

**Figure S4.** Sulfuric acid rate at 130 °C for the studied membranes. Measurements carried out at a cell voltage of 0.6 V.

**Table S1.** SO<sub>2</sub> depolarized results found in literature

| Reference | Membrane       | Voltage [V] | Temperature [°C] | Current Density [mA·cm <sup>-2</sup> ] |
|-----------|----------------|-------------|------------------|----------------------------------------|
| [1]       | PBI            | 0.75        | 80               | 0.3                                    |
| [2]       | PBI blend      | 0.85        | 80               | 0.3                                    |
| [3]       | Nafion 117     | 1           | 80               | 0.2                                    |
| [4]       | Nafion 115     | 0.85        | 80               | 0.2                                    |
| This work | PBI-GO (1 wt%) | 0.8         | 130              | 0.2                                    |



1. Peach, R.; Krieg, H.M.; Krüger, A.J.; Bessarabov, D.; Kerres, J. PBI-blended Membrane Evaluated in High Temperature SO<sub>2</sub> Electrolyzer. *ECS Trans.* **2018**, *85*, 21–28.
2. Peach, R.; Krieg, H.M.; Krüger, A.J.; Rossouw, J.J.C.; Bessarabov, D.; Kerres, J. Novel cross-linked partially fluorinated and non-fluorinated polyaromatic PBI-containing blend membranes for SO<sub>2</sub>electrolysis. *Int. J. Hydrogen Energy* **2016**, *41*, 11868–11883, doi:10.1016/j.ijhydene.2016.05.246.
3. Krüger, A.J.; Krieg, H.M.; Grigoriev, S.A.; Bessarabov, D. Various operating methods and parameters for SO<sub>2</sub> electrolysis. *Energy Sci. Eng.* **2015**, *3*, 468–480, doi:10.1002/ese3.80.
4. Peach, R.; Krieg, H.M.; Krüger, A.J.; Van Der Westhuizen, D.; Bessarabov, D.; Kerres, J. Comparison of ionically and ionic-covalently cross-linked polyaromatic membranes for SO<sub>2</sub> electrolysis. *Int. J. Hydrogen Energy* **2014**, *39*, 28–40, doi:10.1016/j.ijhydene.2013.10.023.
